# Supplementary material
Source: publisher figshare collection journal article supplement (https://tandf.figshare.com/articles/dataset/_/11719572)
Supplement: Supplementary file 1 [file 2]

Archive with 2 entries (2 files):
- tbsd_a_1720818_sm9582.pdf
- tbsd_a_1720818_sm9581.pdf
