# Supplementary material
Source: publisher figshare collection journal article supplement (https://tandf.figshare.com/articles/dataset/_/11719572)
Supplement: Supplementary file 1 [file 2 › tbsd_a_1720818_sm9581.pdf]

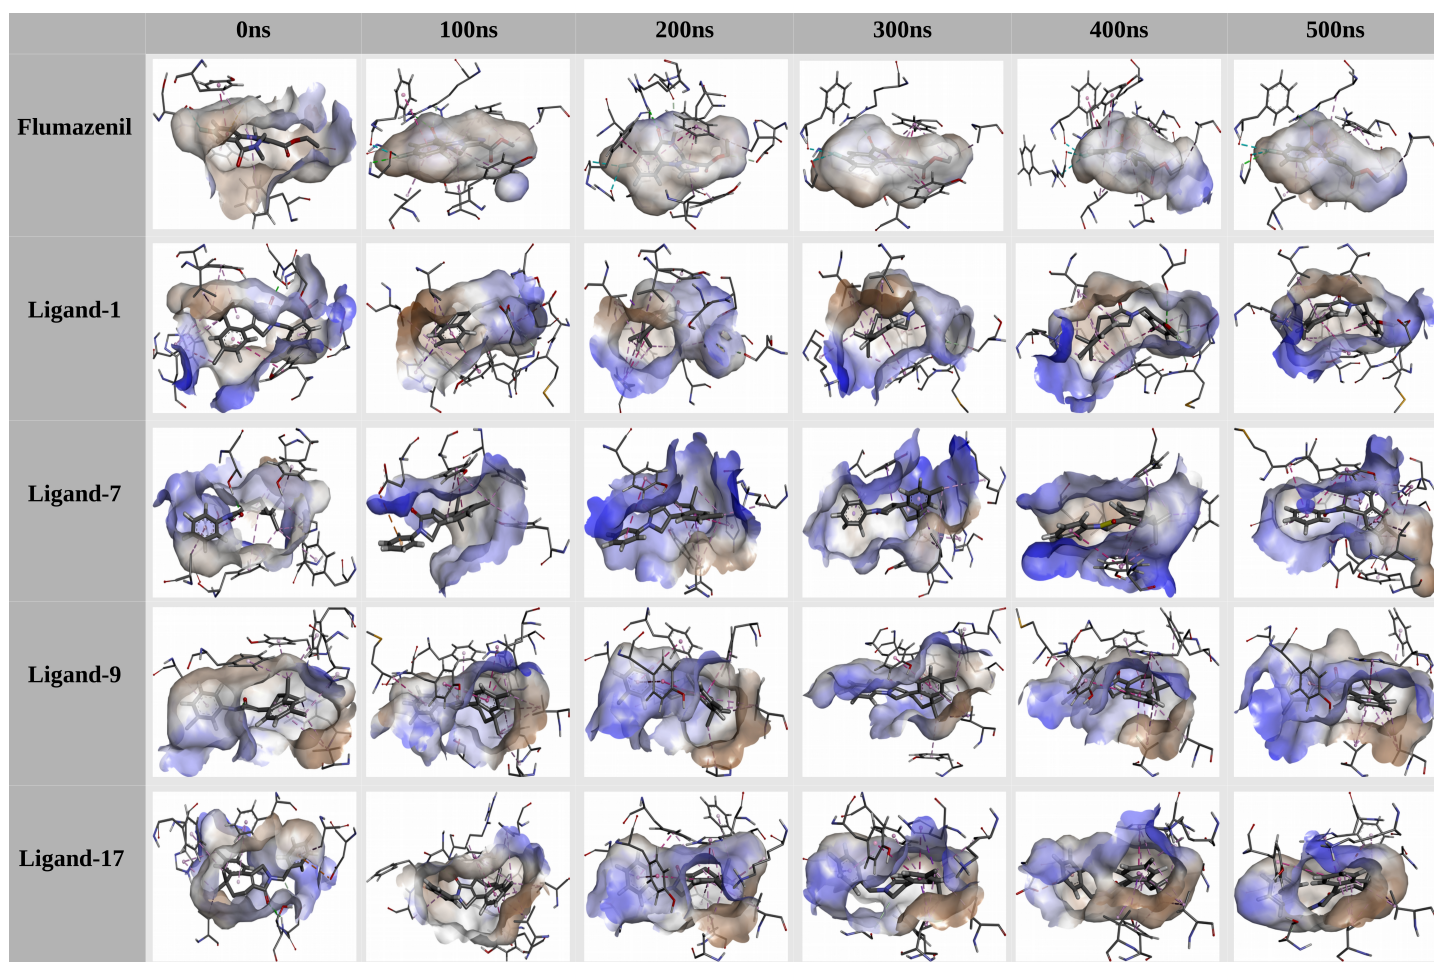

**Supplementary Fig1** Static images of the ligand molecules inside the binding pocket showing the various receptor-ligand interactions during the simulation time period.
