# Supplementary material
Source: publisher figshare collection journal article supplement (https://tandf.figshare.com/articles/dataset/_/11719572)
Supplement: Supplementary file 1 [file 2 › tbsd_a_1720818_sm9582.pdf]

Supplementary Table 1: Results of Hyde calculations for the ligand molecules performed by SeeSAR v9.2

| S.No. | Ligands Name | LLE                                                                                 | LE                                                                                  | Estimated Affinity |                                                                                     |                                                                                     |    | Torsion                                                                               |
|-------|--------------|-------------------------------------------------------------------------------------|-------------------------------------------------------------------------------------|--------------------|-------------------------------------------------------------------------------------|-------------------------------------------------------------------------------------|----|---------------------------------------------------------------------------------------|
|       |              |                                                                                     |                                                                                     | pM                 | nM                                                                                  | μM                                                                                  | mM |                                                                                       |
| 1.    | Ligand-1     | 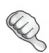   | 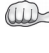   |                    | 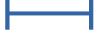   |                                                                                     |    | 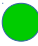   |
| 2.    | Ligand-9     | 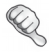   | 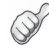   |                    | 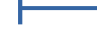   |                                                                                     |    | 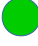   |
| 3.    | Ligand-7     | 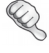   | 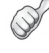   |                    | 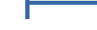   |                                                                                     |    | 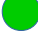   |
| 4.    | Ligand-17    | 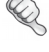   | 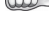   |                    | 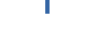   |                                                                                     |    | 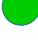   |
| 5.    | Ligand-11    | 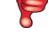   | 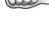   |                    | 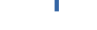   |                                                                                     |    | 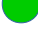   |
| 6.    | Ligand-10    | 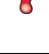   | 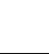   |                    | 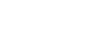   |                                                                                     |    | 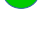   |
| 7.    | Ligand-5     | 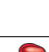  | 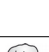  |                    | 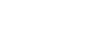  |                                                                                     |    | 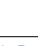  |
| 8.    | Ligand-3     | 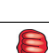 | 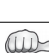 |                    | 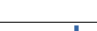 |                                                                                     |    | 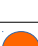 |
| 9.    | Ligand-16    | 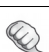 | 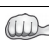 |                    | 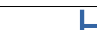 |                                                                                     |    | 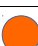 |
| 10.   | Ligand-15    | 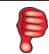 | 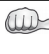 |                    | 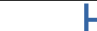 |                                                                                     |    | 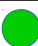 |
| 11.   | Ligand-13    | 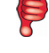 | 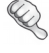 |                    | 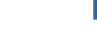 |                                                                                     |    | 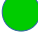 |
| 12.   | Ligand-4     | 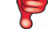 | 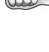 |                    |  |                                                                                     |    | 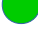 |
| 13.   | Ligand-8     | 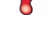 | 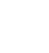 |                    |  |                                                                                     |    | 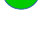 |
| 14.   | Ligand-14    | 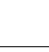 | 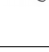 |                    |  |                                                                                     |    | 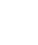 |
| 15.   | Ligand-12    | 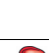 | 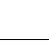 |                    |  |                                                                                     |    | 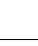 |
| 16.   | Ligand-2     | 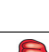 | 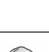 |                    |  |                                                                                     |    | 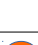 |
| 17.   | Ligand-6     | 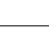 |  |                    | 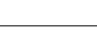 |                                                                                     |    | 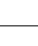 |
| 18.   | Flumazenil   | 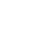 |  |                    |                                                                                     |  |    |  |

Supplementary Table 2: Binding energy constituents for different time fragments

| 48-50 ns   | Binding Energy | Van der Waal's Energy | Electrostatic Energy | Polar Solvation Energy | SASA Energy |
|------------|----------------|-----------------------|----------------------|------------------------|-------------|
| FYP        | -213.029       | -244.404              | -12.319              | 59.597                 | -15.903     |
| Ligand 1   | -215.409       | -275.072              | -17.025              | 95.891                 | -19.202     |
| Ligand 7   | -209.469       | -242.735              | -7.044               | 57.462                 | -17.152     |
| Ligand 9   | -225.522       | -261.716              | -6.233               | 61.086                 | -18.660     |
| Ligand 17  | -229.364       | -260.982              | -7.966               | 57.634                 | -18.051     |
| 148-150 ns |                |                       |                      |                        |             |
| FYP        | -223.405       | -254.795              | -14.200              | 61.243                 | -15.653     |
| Ligand 1   | -270.784       | -316.719              | -16.838              | 82.299                 | -19.526     |
| Ligand 7   | -165.474       | -205.831              | -6.367               | 62.905                 | -16.182     |
| Ligand 9   | -209.839       | -246.813              | -9.761               | 65.056                 | -18.322     |
| Ligand 17  | -240.001       | -271.979              | -4.383               | 55.311                 | -18.951     |
| 248-250 ns |                |                       |                      |                        |             |
| FYP        | -226.585       | -260.621              | -10.124              | 59.485                 | -15.653     |
| Ligand 1   | -262.330       | -299.052              | -17.700              | 74.235                 | -19.812     |
| Ligand 7   | -190.378       | -238.576              | -9.061               | 75.327                 | -18.068     |
| Ligand 9   | -223.888       | -257.371              | -16.165              | 67.594                 | -17.946     |
| Ligand 17  | -239.739       | -267.899              | -5.248               | 51.771                 | -18.363     |
| 348-350 ns |                |                       |                      |                        |             |
| FYP        | -226.020       | -260.170              | -12.291              | 61.795                 | -15.354     |
| Ligand 1   | -222.208       | -272.030              | -6.489               | 76.476                 | -20.165     |
| Ligand 7   | -207.425       | -244.581              | -2.568               | 56.933                 | -17.208     |
| Ligand 9   | -218.309       | -269.405              | -10.069              | 79.990                 | -18.825     |
| Ligand 17  | -236.315       | -274.744              | -5.917               | 62.691                 | -18.345     |
| 448-450 ns |                |                       |                      |                        |             |
| FYP        | -228.647       | -264.594              | -11.686              | 63.712                 | -16.079     |
| Ligand 1   | -208.196       | -277.504              | -5.426               | 94.960                 | -20.226     |
| Ligand 7   | -208.769       | -246.905              | 0.491                | 55.039                 | -17.394     |
| Ligand 9   | -216.707       | -258.072              | -4.849               | 65.042                 | -18.827     |
| Ligand 17  | -255.836       | -293.404              | -6.474               | 62.722                 | -18.679     |

Supplementary Table 3: Contribution energies of binding pocket residues at different time fragments.

| GABA <sub>A</sub><br>Rs | 48-50 ns |               | 148-150 ns |               | 248-250 ns |               | 348-350 ns |               | 448-450 ns |               |
|-------------------------|----------|---------------|------------|---------------|------------|---------------|------------|---------------|------------|---------------|
| $\alpha$ 1-<br>subunit  | FYP      | Ligand-<br>17 | FYP        | Ligand-<br>17 | FYP        | Ligand-<br>17 | FYP        | Ligand-<br>17 | FYP        | Ligand-<br>17 |
| <b>Phe100</b>           | -5.5361  | -4.0888       | -6.5843    | -4.8200       | -5.1172    | -4.4057       | -5.7201    | -4.8331       | -6.6078    | -5.3261       |
| <b>His102</b>           | -6.8749  | -9.4694       | -6.8019    | -6.8018       | -6.9461    | -7.5058       | -7.6851    | -7.0911       | -7.4626    | -6.2328       |
| <b>Tyr160</b>           | -5.8403  | -7.1327       | -8.9861    | -4.6164       | -7.9399    | -4.6756       | -7.2858    | -4.5247       | -7.7489    | -4.8112       |
| Val203                  | -6.4392  | -7.1493       | -6.0054    | -7.8894       | -5.2475    | -8.0615       | -4.3311    | -7.2795       | -7.9448    | -7.7411       |
| <b>Tyr210</b>           | -12.3789 | -6.9399       | -14.4341   | -9.2493       | -15.055    | -8.7083       | -14.808    | -7.1389       | -13.4917   | -8.6000       |
| Val212                  | -5.6497  | -6.3438       | -4.8641    | -5.6685       | -6.4998    | -5.1959       | -6.5691    | -5.0223       | -3.2042    | -4.6821       |
| $\gamma$ 2-<br>Subunit  |          |               |            |               |            |               |            |               |            |               |
| <b>Tyr58</b>            | -5.4686  | -1.3826       | -5.7879    | -8.9735       | -5.7240    | -9.9728       | -8.3821    | -9.2605       | -8.3533    | -9.8188       |
| Asn60                   | -        | -0.0555       | -          | -1.3457       | -          | -1.0910       | -          | -1.3882       | -          | -1.3112       |
| <b>Phe77</b>            | -17.9415 | -12.7429      | -17.6219   | -15.3973      | -18.4165   | -13.1408      | -18.319    | -14.4355      | -18.1627   | -13.8003      |
| Ala79                   | -        | -             | -2.4311    | -3.2400       | -1.8225    | -3.4603       | -1.7868    | -3.3513       | -1.7513    | -3.3893       |
| Arg132                  | -        | -1.0638       | -          | -             | -          | -             | -          | -             | -          | -             |
| <b>Thr142</b>           | -1.6687  | -5.2574       | -3.3898    | -4.7106       | -1.9887    | -4.8394       | -1.8560    | -4.6086       | -1.7789    | -4.6247       |
| Lys184                  | -        | -             | -1.7882    | -             | -1.7261    | -             | -2.5057    | -             | -0.9786    | -             |
| Glu189                  | -        | -             | -          | -1.0710       | -          | -1.7644       | -          | -1.8693       | -          | -1.1320       |
| Asp192                  | -        | -             | -          | -1.1708       | -          | -1.2764       | -          | -1.2614       | -          | -1.3684       |

- Residues depicted in bold are present in the crystal structure of GABA<sub>A</sub>Rs with Flumazenil.
- Residues not showing any interaction are indicated by ‘-’ symbol.
